# Supplementary material for: Tracing Evolutionary Footprints to Identify Novel Gene Functional Linkages
Source: PLoS One. 2013 Jun 25;8(6):e66817. doi: 10.1371/journal.pone.0066817 (PMC3692504; doi:10.1371/journal.pone.0066817)
Supplement: Table S1 — Detailed information for the TRACE analysis of top 20 ranked genes of R-ParB protein (GI 111020643). (XLS) [file pone.0066817.s002.xls]

## Sheet: Sheet1
Table S1. Detailed information for the TRACE analysis of top 20 ranked genes of R-ParB protein (GI 111020643).
Rank	Protein GI	Gene Name	Function Description	COG_Ontology	EC_Number	GOTERM_BP_FAT	INTERPRO	PFAM
1	111020644	RHA1_ro03655	chromosome partitioning protein ParA	Cell division and chromosome partitioning,		GO:0006766~vitamin metabolic process,GO:0006767~water-soluble vitamin metabolic process,GO:0006778~porphyrin metabolic process,GO:0006779~porphyrin biosynthetic process,GO:0009110~vitamin biosynthetic process,GO:0009235~cobalamin metabolic process,GO:0009236~cobalamin biosynthetic process,GO:0018130~heterocycle biosynthetic process,GO:0033013~tetrapyrrole metabolic process,GO:0033014~tetrapyrrole…	IPR002586:Cobyrinic acid a,c-diamide synthase,	PF01656:CbiA,PF01656:CobQ/CobB/MinD/ParA nucleotide binding domain,
2	111017945	RHA1_ro00928	ParaA family ATPase	Cell division and chromosome partitioning,		GO:0006766~vitamin metabolic process,GO:0006767~water-soluble vitamin metabolic process,GO:0006778~porphyrin metabolic process,GO:0006779~porphyrin biosynthetic process,GO:0009110~vitamin biosynthetic process,GO:0009235~cobalamin metabolic process,GO:0009236~cobalamin biosynthetic process,GO:0018130~heterocycle biosynthetic process,GO:0033013~tetrapyrrole metabolic process,GO:0033014~tetrapyrrole…	IPR002586:Cobyrinic acid a,c-diamide synthase,	PF01656:CbiA,PF01656:CobQ/CobB/MinD/ParA nucleotide binding domain,
3	111019886	RHA1_ro02895	ParA family chromosome partitioning ATPase	Cell division and chromosome partitioning,		GO:0006766~vitamin metabolic process,GO:0006767~water-soluble vitamin metabolic process,GO:0006778~porphyrin metabolic process,GO:0006779~porphyrin biosynthetic process,GO:0009110~vitamin biosynthetic process,GO:0009235~cobalamin metabolic process,GO:0009236~cobalamin biosynthetic process,GO:0018130~heterocycle biosynthetic process,GO:0033013~tetrapyrrole metabolic process,GO:0033014~tetrapyrrole…	IPR002586:Cobyrinic acid a,c-diamide synthase,	PF01656:CbiA,PF01656:CobQ/CobB/MinD/ParA nucleotide binding domain,
4	111023313	RHA1_ro06350	porulation initiation inhibitor protein	Cell division and chromosome partitioning,		GO:0006766~vitamin metabolic process,GO:0006767~water-soluble vitamin metabolic process,GO:0006778~porphyrin metabolic process,GO:0006779~porphyrin biosynthetic process,GO:0009110~vitamin biosynthetic process,GO:0009235~cobalamin metabolic process,GO:0009236~cobalamin biosynthetic process,GO:0018130~heterocycle biosynthetic process,GO:0033013~tetrapyrrole metabolic process,GO:0033014~tetrapyrrole…	IPR002586:Cobyrinic acid a,c-diamide synthase,	PF01656:CbiA,PF01656:CobQ/CobB/MinD/ParA nucleotide binding domain,
5	111017944	RHA1_ro00927	segregation and condensation protein			GO:0007049~cell cycle,GO:0007059~chromosome segregation,GO:0051301~cell division,	IPR003768:Prokaryotic chromosome segregation and condensation protein ScpA,	PF02616:ScpA/B protein,PF02616:ScpA_ScpB,
6	111020645	RHA1_ro03656	16S rRNA methyltransferase GidB		2.1.1.-,	GO:0006364~rRNA processing,GO:0006396~RNA processing,GO:0007049~cell cycle,GO:0016072~rRNA metabolic process,GO:0022613~ribonucleoprotein complex biogenesis,GO:0034470~ncRNA processing,GO:0034660~ncRNA metabolic process,GO:0042254~ribosome biogenesis,	IPR003682:Glucose inhibited division protein,	PF02527:GidB,
7	111018674	RHA1_ro01675	chromosome partitioning ATPase protein	Cell division and chromosome partitioning,		GO:0006766~vitamin metabolic process,GO:0006767~water-soluble vitamin metabolic process,GO:0006778~porphyrin metabolic process,GO:0006779~porphyrin biosynthetic process,GO:0009110~vitamin biosynthetic process,GO:0009235~cobalamin metabolic process,GO:0009236~cobalamin biosynthetic process,GO:0018130~heterocycle biosynthetic process,GO:0033013~tetrapyrrole metabolic process,GO:0033014~tetrapyrrole…	IPR002586:Cobyrinic acid a,c-diamide synthase,	PF01656:CbiA,PF01656:CobQ/CobB/MinD/ParA nucleotide binding domain,
8	111017943	RHA1_ro00926	hypothetical protein			GO:0007049~cell cycle,GO:0007059~chromosome segregation,GO:0051301~cell division,	IPR005234:Prokaryotic chromosome segregation and condensation protein ScpB,IPR011991:Winged helix repressor DNA-binding,	PF04079:DUF387,PF04079:Putative transcriptional regulators,
9	111022944	RHA1_ro05981	ATPase	Cell division and chromosome partitioning,			IPR000808:Mrp, conserved site,IPR002744:Protein of unknown function DUF59,IPR019591:ATPase-like, ParA/MinD,	PF01883:Domain of unknown function DUF59,PF01883:DUF59,PF10609:ParA,PF10609:ParA/MinD ATPase like,
10	111020171	RHA1_ro03182	chromosome partitioning protein-like protein
11	111017847	RHA1_ro00828	precorrin-6Y C(5,15)-methyltransferase (decarboxylating)		2.1.1.132,	GO:0006766~vitamin metabolic process,GO:0006767~water-soluble vitamin metabolic process,GO:0006778~porphyrin metabolic process,GO:0006779~porphyrin biosynthetic process,GO:0009110~vitamin biosynthetic process,GO:0009235~cobalamin metabolic process,GO:0009236~cobalamin biosynthetic process,GO:0018130~heterocycle biosynthetic process,GO:0033013~tetrapyrrole metabolic process,GO:0033014~tetrapyrrole…	IPR000878:Tetrapyrrole methylase,IPR006365:Cobalamin (vitamin B12) biosynthesis CobL, precorrin-6Y C5,15-methyltransferase,IPR012818:Cobalamin (vitamin B12) biosynthesis CbiE, precorrin-6Y methyltransferase, core,IPR014008:Cobalamin (vitamin B12) biosynthesis CbiT, precorrin-6Y methyltransferase-core,IPR014777:Tetrapyrrole methylase, subdomain 1,	PF00590:Tetrapyrrole,PF00590:TP_methylase,
12	111022419	RHA1_ro05453	protein-tyrosine kinase		2.7.10.1,	GO:0000271~polysaccharide biosynthetic process,GO:0005976~polysaccharide metabolic process,GO:0008610~lipid biosynthetic process,GO:0008653~lipopolysaccharide metabolic process,GO:0009103~lipopolysaccharide biosynthetic process,GO:0016051~carbohydrate biosynthetic process,GO:0033692~cellular polysaccharide biosynthetic process,GO:0034637~cellular carbohydrate biosynthetic process,GO:0044264~cellu…	IPR003856:Lipopolysaccharide biosynthesis,IPR005702:Exopolysaccharide synthesis protein,	PF02706:Wzz,
13	111017846	RHA1_ro00827	precorrin-4 C(11)-methyltransferase		2.1.1.133,	GO:0006766~vitamin metabolic process,GO:0006767~water-soluble vitamin metabolic process,GO:0006778~porphyrin metabolic process,GO:0006779~porphyrin biosynthetic process,GO:0009110~vitamin biosynthetic process,GO:0009235~cobalamin metabolic process,GO:0009236~cobalamin biosynthetic process,GO:0018130~heterocycle biosynthetic process,GO:0033013~tetrapyrrole metabolic process,GO:0033014~tetrapyrrole…	IPR000878:Tetrapyrrole methylase,IPR003043:Uroporphiryn-III C-methyltransferase, conserved site,IPR006362:Cobalamin (vitamin B12) biosynthesis CobM/CbiF, precorrin-4 C11-methyltransferase, core,IPR014776:Tetrapyrrole methylase, subdomain 2,IPR014777:Tetrapyrrole methylase, subdomain 1,	PF00590:Tetrapyrrole,PF00590:TP_methylase,
14	111021316	RHA1_ro04340	conjugal transfer protein				IPR001482:Type II secretion system protein E,	PF00437:GSPII_E,
15	111019024	RHA1_ro02031	hypothetical protein	Cell motility,
16	111023972	RHA1_ro07020	protein-tyrosine kinase	Cell division and chromosome partitioning,	2.7.10.1,
17	111019111	RHA1_ro02118	RNA polymerase sigma factor SigF			GO:0006350~transcription,GO:0006351~transcription, DNA-dependent,GO:0006352~transcription initiation,GO:0006355~regulation of transcription, DNA-dependent,GO:0006461~protein complex assembly,GO:0032774~RNA biosynthetic process,GO:0043933~macromolecular complex subunit organization,GO:0045449~regulation of transcription,GO:0051252~regulation of RNA metabolic process,GO:0065003~macromolecular compl…	IPR000943:RNA polymerase sigma-70 factor,IPR007624:RNA polymerase sigma-70 region 3,IPR007627:RNA polymerase sigma-70 region 2,IPR007630:RNA polymerase sigma-70 region 4,IPR011991:Winged helix repressor DNA-binding,IPR014284:RNA polymerase sigma-70,IPR014322:RNA polymerase sigma-B/F/G type,	PF04539:Sigma70_r3,PF04542:Sigma70_r2,PF04545:Sigma70_r4,
18	111021699	RHA1_ro04728	sigma factor, sigma 70 type, group 3			GO:0006350~transcription,GO:0006351~transcription, DNA-dependent,GO:0006352~transcription initiation,GO:0006355~regulation of transcription, DNA-dependent,GO:0006461~protein complex assembly,GO:0032774~RNA biosynthetic process,GO:0043933~macromolecular complex subunit organization,GO:0045449~regulation of transcription,GO:0051252~regulation of RNA metabolic process,GO:0065003~macromolecular compl…	IPR000943:RNA polymerase sigma-70 factor,IPR007624:RNA polymerase sigma-70 region 3,IPR007627:RNA polymerase sigma-70 region 2,IPR007630:RNA polymerase sigma-70 region 4,IPR014284:RNA polymerase sigma-70,IPR014322:RNA polymerase sigma-B/F/G type,	PF04539:Sigma70_r3,PF04542:Sigma70_r2,PF04545:Sigma70_r4,
19	111017120	RHA1_ro00098	sigma factor, sigma 70 type, group 3			GO:0006350~transcription,GO:0006351~transcription, DNA-dependent,GO:0006352~transcription initiation,GO:0006355~regulation of transcription, DNA-dependent,GO:0006461~protein complex assembly,GO:0032774~RNA biosynthetic process,GO:0043933~macromolecular complex subunit organization,GO:0045449~regulation of transcription,GO:0051252~regulation of RNA metabolic process,GO:0065003~macromolecular compl…	IPR000943:RNA polymerase sigma-70 factor,IPR007624:RNA polymerase sigma-70 region 3,IPR007627:RNA polymerase sigma-70 region 2,IPR007630:RNA polymerase sigma-70 region 4,IPR011991:Winged helix repressor DNA-binding,IPR014284:RNA polymerase sigma-70,IPR014322:RNA polymerase sigma-B/F/G type,	PF04539:Sigma-70 region 3,PF04539:Sigma70_r3,PF04542:Sigma-70 region 2,PF04542:Sigma70_r2,PF04545:Sigma-70, region 4,PF04545:Sigma70_r4,
20	111023564	RHA1_ro06605	cobyric acid synthase			GO:0006541~glutamine metabolic process,GO:0006766~vitamin metabolic process,GO:0006767~water-soluble vitamin metabolic process,GO:0006778~porphyrin metabolic process,GO:0006779~porphyrin biosynthetic process,GO:0009064~glutamine family amino acid metabolic process,GO:0009110~vitamin biosynthetic process,GO:0009235~cobalamin metabolic process,GO:0009236~cobalamin biosynthetic process,GO:0018130~he…	IPR002586:Cobyrinic acid a,c-diamide synthase,IPR004459:Cobyric acid synthase CobQ,IPR011698:CobB/CobQ-like glutamine amidotransferase,IPR017929:CobB/CobQ glutamine amidotransferase,	PF01656:CbiA,PF01656:CobQ/CobB/MinD/ParA nucleotide binding domain,PF07685:CobB/CobQ-like glutamine amidotransferase domain,PF07685:GATase_3,
