# Supplementary material for: Tracing Evolutionary Footprints to Identify Novel Gene Functional Linkages
Source: PLoS One. 2013 Jun 25;8(6):e66817. doi: 10.1371/journal.pone.0066817 (PMC3692504; doi:10.1371/journal.pone.0066817)
Supplement: Table S2 — List of 341 genomes used in constructing the gene functional network. (XLS) [file pone.0066817.s003.xls]

## Sheet: Sheet1
Table S2. List of 341 genomes used in constructing the gene functional network.
Genus	Strain	Gene Number	Coding Length (a.a)	NCBI ID
Acaryochloris	Acaryochloris_marina_MBIC11017_uid58167	8383	3125275	NC_009925 NC_009926 NC_009927 NC_009928 NC_009929 NC_009930 NC_009931 NC_009932 NC_009933 NC_009934
Acetobacter	Acetobacter_pasteurianus_IFO_3283_01_uid59279	3049	1316690	NC_013209 NC_013210 NC_013211 NC_013212 NC_013213 NC_013214 NC_013215
Acholeplasma	Acholeplasma_laidlawii_PG_8A_uid58901	1380	591878	NC_010163
Acidimicrobium	Acidimicrobium_ferrooxidans_DSM_10331_uid59215	1964	860566	NC_013124
Acidiphilium	Acidiphilium_cryptum_JF_5_uid58447	3559	1539667	NC_009467 NC_009468 NC_009469 NC_009470 NC_009471 NC_009472 NC_009473 NC_009474 NC_009484
Acidithiobacillus	Acidithiobacillus_ferrooxidans_ATCC_23270_uid57649	3147	1255188	NC_011761
Acidobacterium	Acidobacterium_capsulatum_ATCC_51196_uid59127	3377	1566864	NC_012483
Acidothermus	Acidothermus_cellulolyticus_11B_uid58501	2157	952573	NC_008578
Acidovorax	Acidovorax_citrulli_AAC00_1_uid58429	4709	2011028	NC_008752
Acinetobacter	Acinetobacter_baumannii_AB0057_uid59083	3801	1546750	NC_011585 NC_011586
Actinobacillus	Actinobacillus_pleuropneumoniae_serovar_7_AP76_uid59231	2142	952569	NC_010939 NC_010940 NC_010941 NC_010942
Actinosynnema	Actinosynnema_mirum_DSM_43827_uid58951	6916	3111804	NC_013093
Aeromonas	Aeromonas_salmonicida_A449_uid58631	4436	1856225	NC_004923 NC_004924 NC_004925 NC_009348 NC_009349 NC_009350
Aeropyrum	Aeropyrum_pernix_K1_uid57757	1700	641751	NC_000854
Aggregatibacter	Aggregatibacter_aphrophilus_NJ8700_uid59407	2219	897271	NC_012913
Agrobacterium	Agrobacterium_radiobacter_K84_uid58269	6684	2791051	NC_011983 NC_011985 NC_011987 NC_011990 NC_011994
Akkermansia	Akkermansia_muciniphila_ATCC_BAA_835_uid58985	2138	1007656	NC_010655
Alcanivorax	Alcanivorax_borkumensis_SK2_uid58169	2755	1150724	NC_008260
Alicyclobacillus	Alicyclobacillus_acidocaldarius_DSM_446_uid59199	3084	1326292	NC_013205 NC_013206 NC_013207 NC_013208
Aliivibrio	Aliivibrio_salmonicida_LFI1238_uid59251	3911	1595894	NC_011311 NC_011312 NC_011313 NC_011314 NC_011315 NC_011316
Alkalilimnicola	Alkalilimnicola_ehrlichii_MLHE_1_uid58467	2865	1286131	NC_008340
Alkaliphilus	Alkaliphilus_metalliredigens_QYMF_uid58171	4625	1861903	NC_009633
Alteromonas	Alteromonas_macleodii__Deep_ecotype__uid58251	4084	1757780	NC_011138
Anaerococcus	Anaerococcus_prevotii_DSM_20548_uid59219	1806	781421	NC_013164 NC_013171
Anaeromyxobacter	Anaeromyxobacter_Fw109_5_uid58755	4466	2043526	NC_009675
Anaplasma	Anaplasma_phagocytophilum_HZ_uid57951	1264	456918	NC_007797
Anoxybacillus	Anoxybacillus_flavithermus_WK1_uid59135	2831	1130884	NC_011567
Aquifex	Aquifex_aeolicus_VF5_uid57765	1560	627187	NC_000918 NC_001880
Archaeoglobus	Archaeoglobus_fulgidus_DSM_4304_uid57717	2420	908871	NC_000917
Arcobacter	Arcobacter_butzleri_RM4018_uid58557	2259	952308	NC_009850
Aromatoleum	Aromatoleum_aromaticum_EbN1_uid58231	4579	1857762	NC_006513 NC_006823 NC_006824
Arthrobacter	Arthrobacter_aurescens_TC1_uid58109	4588	1971802	NC_008711 NC_008712 NC_008713
Aster	Aster_yellows_witches_broom_phytoplasma_AYWB_uid58297	693	255039	NC_007716 NC_007717 NC_007718 NC_007719 NC_007720
Atopobium	Atopobium_parvulum_DSM_20469_uid59195	1353	599262	NC_013203
Azoarcus	Azoarcus_BH72_uid61603	3989	1637838	NC_008702
Azorhizobium	Azorhizobium_caulinodans_ORS_571_uid58905	4717	2093263	NC_009937
Azotobacter	Azotobacter_vinelandii_DJ_uid57597	5050	2039410	NC_012560
Bacillus	Bacillus_weihenstephanensis_KBAB4_uid58315	5653	2196957	NC_010180 NC_010181 NC_010182 NC_010183 NC_010184
Bacteroides	Bacteroides_thetaiotaomicron_VPI_5482_uid62913	4816	2379017	NC_004663 NC_004703
Bartonella	Bartonella_tribocorum_CIP_105476_uid59129	2087	841220	NC_010160 NC_010161
Baumannia	Baumannia_cicadellinicola_Hc__Homalodisca_coagulata__uid58111	595	271543	NC_007984
Bdellovibrio	Bdellovibrio_bacteriovorus_HD100_uid61595	3586	1526251	NC_005363
Beijerinckia	Beijerinckia_indica_ATCC_9039_uid59057	3784	1656339	NC_010578 NC_010580 NC_010581
Beutenbergia	Beutenbergia_cavernae_DSM_12333_uid59047	4197	1884562	NC_012669
Bifidobacterium	Bifidobacterium_longum_infantis_ATCC_15697_uid58677	2416	1100281	NC_011593
Bordetella	Bordetella_bronchiseptica_RB50_uid57613	4994	2082336	NC_002927
Borrelia	Borrelia_duttonii_Ly_uid58791	1305	540456	NC_011224 NC_011226 NC_011229 NC_011245 NC_011247 NC_011248 NC_011249 NC_011250 NC_011251 NC_011254 NC_011256 NC_011257 NC_011259 NC_011261 NC_011262 NC_011264 NC_011265
Brachybacterium	Brachybacterium_faecium_DSM_4810_uid58649	3068	1412433	NC_013172
Brachyspira	Brachyspira_hyodysenteriae_WA1_uid59291	2642	1153569	NC_012225 NC_012226
Bradyrhizobium	Bradyrhizobium_japonicum_USDA_110_uid57599	8317	3414899	NC_004463
Brevibacillus	Brevibacillus_brevis_NBRC_100599_uid59175	5947	2458211	NC_012491
Brucella	Brucella_microti_CCM_4915_uid59319	3282	1289721	NC_013118 NC_013119
Buchnera	Buchnera_aphidicola_APS__Acyrthosiphon_pisum__uid57805	574	256817	NC_002252 NC_002253 NC_002528
Burkholderia	Burkholderia_xenovorans_LB400_uid57823	8702	3639396	NC_007951 NC_007952 NC_007953
Caldicellulosiruptor	Caldicellulosiruptor_saccharolyticus_DSM_8903_uid58289	2682	1172085	NC_009437
Caldivirga	Caldivirga_maquilingensis_IC_167_uid58711	1963	810360	NC_009954
Campylobacter	Campylobacter_concisus_13826_uid58667	1989	797049	NC_009795 NC_009796 NC_009802
Candidatus	Candidatus_Solibacter_usitatus_Ellin6076_uid58139	7826	3810131	NC_008536
Capnocytophaga	Capnocytophaga_ochracea_DSM_7271_uid59197	2171	979726	NC_013162
Carboxydothermus	Carboxydothermus_hydrogenoformans_Z_2901_uid57821	2620	1009009	NC_007503
Catenulispora	Catenulispora_acidiphila_DSM_44928_uid59077	8913	4062061	NC_013131
Caulobacter	Caulobacter_K31_uid58551	5438	2229782	NC_010333 NC_010335 NC_010338
Cellvibrio	Cellvibrio_japonicus_Ueda107_uid59139	3750	1755309	NC_010995
Chelativorans	Chelativorans_BNC1_uid58069	4543	1886407	NC_008242 NC_008243 NC_008244 NC_008254
Chitinophaga	Chitinophaga_pinensis_DSM_2588_uid59113	7192	3440788	NC_013132
Chlamydia	Chlamydia_muridarum_Nigg_uid57785	910	408411	NC_002182 NC_002620
Chlamydophila	Chlamydophila_pneumoniae_TW_183_uid57997	1113	478906	NC_005043
Chlorobaculum	Chlorobaculum_parvum_NCIB_8327_uid59185	2043	878115	NC_011027
Chlorobium	Chlorobium_phaeobacteroides_DSM_266_uid58133	2650	1161603	NC_008639
Chloroflexus	Chloroflexus_Y_400_fl_uid59085	4159	1850747	NC_012032
Chloroherpeton	Chloroherpeton_thalassium_ATCC_35110_uid59187	2710	1251252	NC_011026
Chromobacterium	Chromobacterium_violaceum_ATCC_12472_uid58001	4405	1858082	NC_005085
Chromohalobacter	Chromohalobacter_salexigens_DSM_3043_uid62921	3298	1454001	NC_007963
Citrobacter	Citrobacter_koseri_ATCC_BAA_895_uid58143	5006	1972952	NC_009792 NC_009793 NC_009794
Clavibacter	Clavibacter_michiganensis_NCPPB_382_uid61625	3078	1414767	NC_009478 NC_009479 NC_009480
Clostridium	Clostridium_beijerinckii_NCIMB_8052_uid58137	5020	2089142	NC_009617
Colwellia	Colwellia_psychrerythraea_34H_uid57855	4910	1992599	NC_003910
Coprothermobacter	Coprothermobacter_proteolyticus_DSM_5265_uid59253	1482	611096	NC_011295
Corynebacterium	Corynebacterium_glutamicum_ATCC_13032_uid61611	3057	1281646	NC_006958
Coxiella	Coxiella_burnetii_Dugway_5J108_111_uid58629	2045	818929	NC_009726 NC_009727
Cronobacter	Cronobacter_sakazakii_ATCC_BAA_894_uid58145	4422	1819758	NC_009778 NC_009779 NC_009780
Cryptobacterium	Cryptobacterium_curtum_DSM_15641_uid59041	1357	621032	NC_013170
Cupriavidus	Cupriavidus_metallidurans_CH34_uid57815	6477	2706522	NC_007971 NC_007972 NC_007973 NC_007974
Cyanothece	Cyanothece_PCC_7424_uid59025	5710	2330451	NC_011729 NC_011730 NC_011732 NC_011733 NC_011734 NC_011737 NC_011738
Cytophaga	Cytophaga_hutchinsonii_ATCC_33406_uid57651	3785	1718728	NC_008255
Dechloromonas	Dechloromonas_aromatica_RCB_uid58025	4171	1778367	NC_007298
Dehalococcoides	Dehalococcoides_ethenogenes_195_uid57763	1580	597713	NC_002936
Deinococcus	Deinococcus_deserti_VCD115_uid58615	3459	1430517	NC_012526 NC_012527 NC_012528 NC_012529
Delftia	Delftia_acidovorans_SPH_1_uid58703	6040	2629386	NC_010002
Desulfatibacillum	Desulfatibacillum_alkenivorans_AK_01_uid58913	5252	2425385	NC_011768
Desulfitobacterium	Desulfitobacterium_hafniense_Y51_uid58605	5060	2121163	NC_007907
Desulfobacterium	Desulfobacterium_autotrophicum_HRM2_uid59061	4943	2155135	NC_012108 NC_012109
Desulfococcus	Desulfococcus_oleovorans_Hxd3_uid58777	3265	1501603	NC_009943
Desulfohalobium	Desulfohalobium_retbaense_DSM_5692_uid59183	2526	1098338	NC_013223 NC_013224
Desulfomicrobium	Desulfomicrobium_baculatum_DSM_4028_uid59217	3436	1555849	NC_013173
Desulfotalea	Desulfotalea_psychrophila_LSv54_uid58153	3234	1362684	NC_006138 NC_006139 NC_006140
Desulfotomaculum	Desulfotomaculum_acetoxidans_DSM_771_uid59109	4068	1670192	NC_013216
Desulfovibrio	Desulfovibrio_magneticus_RS_1_uid59309	4700	2020122	NC_012795 NC_012796 NC_012797
Desulfurococcus	Desulfurococcus_kamchatkensis_1221n_uid59133	1471	563075	NC_011766
Dichelobacter	Dichelobacter_nodosus_VCS1703A_uid57643	1280	536929	NC_009446
Dickeya	Dickeya_zeae_Ech1591_uid59297	4163	1759003	NC_012912
Dictyoglomus	Dictyoglomus_thermophilum_H_6_12_uid59439	1912	812795	NC_011297
Dinoroseobacter	Dinoroseobacter_shibae_DFL_12_uid58707	4192	1756856	NC_009952 NC_009955 NC_009956 NC_009957 NC_009958 NC_009959
Dyadobacter	Dyadobacter_fermentans_DSM_18053_uid59049	5719	2692854	NC_013037
Edwardsiella	Edwardsiella_ictaluri_93_146_uid59403	3784	1412550	NC_012779
Eggerthella	Eggerthella_lenta_DSM_2243_uid59079	3070	1363249	NC_013204
Ehrlichia	Ehrlichia_chaffeensis_Arkansas_uid57933	1105	426961	NC_007799
Elusimicrobium	Elusimicrobium_minutum_Pei191_uid58949	1529	651395	NC_010644
Enterobacter	Enterobacter_638_uid58727	4240	1762948	NC_009425 NC_009436
Enterococcus	Enterococcus_faecalis_V583_uid57669	3264	1243758	NC_004668 NC_004669 NC_004670 NC_004671
Erwinia	Erwinia_tasmaniensis_Et1_99_uid59029	3622	1514139	NC_010693 NC_010694 NC_010695 NC_010696 NC_010697 NC_010699
Erythrobacter	Erythrobacter_litoralis_HTCC2594_uid58299	3011	1233487	NC_007722
Escherichia	Escherichia_coli_O157_H7_TW14359_uid59235	5365	2192893	NC_013008 NC_013010
Eubacterium	Eubacterium_rectale_ATCC_33656_uid59169	3621	1417521	NC_012781
Exiguobacterium	Exiguobacterium_sibiricum_255_15_uid58053	3015	1206982	NC_010549 NC_010550 NC_010556
Fervidobacterium	Fervidobacterium_nodosum_Rt17_B1_uid58625	1750	774064	NC_009718
Finegoldia	Finegoldia_magna_ATCC_29328_uid58867	1813	780733	NC_010371 NC_010376
Flavobacteriaceae	Flavobacteriaceae_bacterium_3519_10_uid59413	2534	1110218	NC_013062
Flavobacterium	Flavobacterium_johnsoniae_UW101_uid58493	5017	2257595	NC_009441
Francisella	Francisella_philomiragia_ATCC_25017_uid59105	1915	868912	NC_010331 NC_010336
Frankia	Frankia_EAN1pec_uid58367	7191	3110095	NC_009921
Fusobacterium	Fusobacterium_nucleatum_ATCC_25586_uid57885	2063	888082	NC_003454
Gemmatimonas	Gemmatimonas_aurantiaca_T_27_uid58813	3935	1824146	NC_012489
Geobacillus	Geobacillus_thermodenitrificans_NG80_2_uid58829	3445	1385673	NC_009328 NC_009329
Geobacter	Geobacter_uraniireducens_Rf4_uid58475	4358	1939501	NC_009483
Gloeobacter	Gloeobacter_violaceus_PCC_7421_uid58011	4430	1816211	NC_005125
Gluconacetobacter	Gluconacetobacter_diazotrophicus_PAl_5_uid61587	3851	1618021	NC_010123 NC_010124 NC_010125
Gluconobacter	Gluconobacter_oxydans_621H_uid58239	2664	1104553	NC_006672 NC_006673 NC_006674 NC_006675 NC_006676 NC_006677
Gramella	Gramella_forsetii_KT0803_uid58881	3584	1482918	NC_008571
Granulibacter	Granulibacter_bethesdensis_CGDNIH1_uid58661	2433	1060353	NC_008343
Haemophilus	Haemophilus_somnus_2336_uid57979	1980	850176	NC_010519
Hahella	Hahella_chejuensis_KCTC_2396_uid58483	6773	2785232	NC_007645
Haloarcula	Haloarcula_marismortui_ATCC_43049_uid57719	4243	1629256	NC_006389 NC_006390 NC_006391 NC_006392 NC_006393 NC_006394 NC_006395 NC_006396 NC_006397
Halobacterium	Halobacterium_salinarum_R1_uid61571	2749	1048300	NC_010364 NC_010366 NC_010367 NC_010368 NC_010369
Halomicrobium	Halomicrobium_mukohataei_DSM_12286_uid59107	3349	1292991	NC_013201 NC_013202
Haloquadratum	Haloquadratum_walsbyi_DSM_16790_uid58673	2646	1063507	NC_008212 NC_008213
Halorhabdus	Halorhabdus_utahensis_DSM_12940_uid59189	2998	1227215	NC_013158
Halorhodospira	Halorhodospira_halophila_SL1_uid58473	2407	1065761	NC_008789
Halorubrum	Halorubrum_lacusprofundi_ATCC_49239_uid58807	3560	1418838	NC_012028 NC_012029 NC_012030
Halothermothrix	Halothermothrix_orenii_H_168_uid58585	2342	985512	NC_011899
Helicobacter	Helicobacter_hepaticus_ATCC_51449_uid57737	1876	732052	NC_004917
Heliobacterium	Heliobacterium_modesticaldum_Ice1_uid58279	2999	1200586	NC_010337
Herminiimonas	Herminiimonas_arsenicoxydans_uid58291	3295	1303289	NC_009138
Herpetosiphon	Herpetosiphon_aurantiacus_DSM_785_uid58599	5279	2542821	NC_009972 NC_009973 NC_009974
Hirschia	Hirschia_baltica_ATCC_49814_uid59365	3187	1374655	NC_012982 NC_012983
Hydrogenobaculum	Hydrogenobaculum_Y04AAS1_uid58857	1629	663944	NC_011126
Hyperthermus	Hyperthermus_butylicus_DSM_5456_uid57755	1603	615761	NC_008818
Hyphomonas	Hyphomonas_neptunium_ATCC_15444_uid58433	3505	1439248	NC_008358
Idiomarina	Idiomarina_loihiensis_L2TR_uid58087	2628	1119926	NC_006512
Ignicoccus	Ignicoccus_hospitalis_KIN4_I_uid58365	1434	544503	NC_009776
Jannaschia	Jannaschia_CCS1_uid58147	4283	1673083	NC_007801 NC_007802
Janthinobacterium	Janthinobacterium_Marseille_uid58603	3697	1612906	NC_009659
Jonesia	Jonesia_denitrificans_DSM_20603_uid59053	2511	1087866	NC_013174
Kangiella	Kangiella_koreensis_DSM_16069_uid59209	2632	1127107	NC_013166
Kineococcus	Kineococcus_radiotolerans_SRS30216_uid58067	4681	1998474	NC_009660 NC_009664 NC_009806
Klebsiella	Klebsiella_pneumoniae_342_uid59145	5768	2298094	NC_011281 NC_011282 NC_011283
Kocuria	Kocuria_rhizophila_DC2201_uid59099	2357	1028769	NC_010617
Kosmotoga	Kosmotoga_olearia_TBF_19_5_1_uid59205	2118	893458	NC_012785
Kytococcus	Kytococcus_sedentarius_DSM_20547_uid59071	2554	1099001	NC_013169
Lactobacillus	Lactobacillus_plantarum_WCFS1_uid62911	3057	1226218	NC_004567 NC_006375 NC_006376 NC_006377
Lactococcus	Lactococcus_lactis_cremoris_SK11_uid57983	2504	967478	NC_008503 NC_008504 NC_008505 NC_008506 NC_008507 NC_008527
Laribacter	Laribacter_hongkongensis_HLHK9_uid59265	3235	1241759	NC_012559
Lawsonia	Lawsonia_intracellularis_PHE_MN1_00_uid61575	1340	617684	NC_008011 NC_008012 NC_008013 NC_008014
Legionella	Legionella_pneumophila_Corby_uid58733	3204	1377664	NC_009494
Leifsonia	Leifsonia_xyli_CTCB07_uid57759	2030	816827	NC_006087
Leptospira	Leptospira_biflexa_serovar_Patoc__Patoc_1__Paris__uid58993	3726	1716582	NC_010602 NC_010843 NC_010844
Leptothrix	Leptothrix_cholodnii_SP_6_uid58971	4363	1943223	NC_010524
Leptotrichia	Leptotrichia_buccalis_C_1013_b_uid59211	2220	916534	NC_013192
Leuconostoc	Leuconostoc_mesenteroides_ATCC_8293_uid57919	2005	865884	NC_008496 NC_008531
Listeria	Listeria_monocytogenes_Clip80459_uid59317	2766	1205740	NC_012488
Lysinibacillus	Lysinibacillus_sphaericus_C3_41_uid58945	4771	1776424	NC_010381 NC_010382
Macrococcus	Macrococcus_caseolyticus_JCSC5402_uid59003	2053	861854	NC_011995 NC_011996 NC_011997 NC_011998 NC_011999 NC_012000 NC_012001 NC_012002 NC_012003
Magnetococcus	Magnetococcus_MC_1_uid57833	3716	1675223	NC_008576
Magnetospirillum	Magnetospirillum_magneticum_AMB_1_uid58527	4561	1930433	NC_007626
Mannheimia	Mannheimia_succiniciproducens_MBEL55E_uid58197	2370	927387	NC_006300
Maricaulis	Maricaulis_maris_MCS10_uid58689	3063	1266938	NC_008347
Marinobacter	Marinobacter_aquaeolei_VT8_uid59419	4272	1846273	NC_008738 NC_008739 NC_008740
Marinomonas	Marinomonas_MWYL1_uid58715	4439	1922152	NC_009654
Mesoplasma	Mesoplasma_florum_L1_uid58055	682	300612	NC_006055
Mesorhizobium	Mesorhizobium_loti_MAFF303099_uid57601	7272	2838337	NC_002678 NC_002679 NC_002682
Metallosphaera	Metallosphaera_sedula_DSM_5348_uid58717	2256	855174	NC_009440
Methanobrevibacter	Methanobrevibacter_smithii_ATCC_35061_uid58827	1793	757748	NC_009515
Methanocaldococcus	Methanocaldococcus_jannaschii_DSM_2661_uid57713	1771	692068	NC_000909 NC_001732 NC_001733
Methanococcoides	Methanococcoides_burtonii_DSM_6242_uid58023	2273	923562	NC_007955
Methanococcus	Methanococcus_maripaludis_C5_uid58741	1822	703203	NC_009135 NC_009136
Methanocorpusculum	Methanocorpusculum_labreanum_Z_uid58785	1741	704756	NC_008942
Methanoculleus	Methanoculleus_marisnigri_JR1_uid58561	2490	977988	NC_009051
Methanopyrus	Methanopyrus_kandleri_AV19_uid57883	1687	660827	NC_003551
Methanoregula	Methanoregula_boonei_6A8_uid58815	2452	967630	NC_009712
Methanosaeta	Methanosaeta_thermophila_PT_uid58469	1696	681618	NC_008553
Methanosarcina	Methanosarcina_acetivorans_C2A_uid57879	4540	1858178	NC_003552
Methanosphaera	Methanosphaera_stadtmanae_DSM_3091_uid58407	1535	648656	NC_007681
Methanosphaerula	Methanosphaerula_palustris_E1_9c_uid59193	2655	1100798	NC_011832
Methanospirillum	Methanospirillum_hungatei_JF_1_uid58181	3131	1327082	NC_007796
Methanothermobacter	Methanothermobacter_thermautotrophicus_Delta_H_uid57877	1873	736136	NC_000916
Methylacidiphilum	Methylacidiphilum_infernorum_V4_uid59161	2472	955427	NC_010794
Methylibium	Methylibium_petroleiphilum_PM1_uid58085	4449	1875732	NC_008825 NC_008826
Methylobacillus	Methylobacillus_flagellatus_KT_uid58049	2753	1167362	NC_007947
Methylobacterium	Methylobacterium_nodulans_ORS_2060_uid59023	8308	3261221	NC_011887 NC_011888 NC_011889 NC_011890 NC_011892 NC_011893 NC_011894 NC_011895
Methylocella	Methylocella_silvestris_BL2_uid59433	3818	1611658	NC_011666
Methylococcus	Methylococcus_capsulatus_Bath_uid57607	2956	1287526	NC_002977
Methylotenera	Methylotenera_mobilis_JLW8_uid59373	2338	996531	NC_012968
Methylovorus	Methylovorus_glucosetrophus_SIP3_4_uid59367	2909	1254442	NC_012969 NC_012970 NC_012972
Micrococcus	Micrococcus_luteus_NCTC_2665_uid59033	2236	978382	NC_012803
Microcystis	Microcystis_aeruginosa_NIES_843_uid59101	6312	2218482	NC_010296
Moorella	Moorella_thermoacetica_ATCC_39073_uid58051	2463	1008619	NC_007644
Mycobacterium	Mycobacterium_smegmatis_MC2_155_uid57701	6717	2778712	NC_008596
Mycoplasma	Mycoplasma_penetrans_HF_2_uid57729	1037	497321	NC_004432
Myxococcus	Myxococcus_xanthus_DK_1622_uid58003	7316	3482390	NC_008095
Nakamurella	Nakamurella_multipartita_DSM_44233_uid59221	5240	2327236	NC_013235
Nanoarchaeum	Nanoarchaeum_equitans_Kin4_M_uid58009	540	202134	NC_005213
Natranaerobius	Natranaerobius_thermophilus_JW_NM_WN_LF_uid59001	2906	1246412	NC_010715 NC_010718 NC_010724
Natronomonas	Natronomonas_pharaonis_DSM_2160_uid58435	2820	1110026	NC_007426 NC_007427 NC_007428
Nautilia	Nautilia_profundicola_AmH_uid59345	1730	692951	NC_012115
Neisseria	Neisseria_gonorrhoeae_NCCP11945_uid59191	2680	914333	NC_011034 NC_011035
Neorickettsia	Neorickettsia_risticii_Illinois_uid58889	892	349239	NC_013009
Nitratiruptor	Nitratiruptor_SB155_2_uid58861	1843	770467	NC_009662
Nitrobacter	Nitrobacter_hamburgensis_X14_uid58293	4326	1741987	NC_007959 NC_007960 NC_007961 NC_007964
Nitrosococcus	Nitrosococcus_oceani_ATCC_19707_uid58403	3017	1293701	NC_007483 NC_007484
Nitrosomonas	Nitrosomonas_europaea_ATCC_19718_uid57647	2461	1050048	NC_004757
Nitrosopumilus	Nitrosopumilus_maritimus_SCM1_uid58903	1796	677409	NC_010085
Nitrosospira	Nitrosospira_multiformis_ATCC_25196_uid58361	2805	1212724	NC_007614 NC_007615 NC_007616 NC_007617
Nocardia	Nocardia_farcinica_IFM_10152_uid58203	5934	2438861	NC_006361 NC_006362 NC_006363
Nocardioides	Nocardioides_JS614_uid58149	4909	2018794	NC_008697 NC_008699
Nostoc	Nostoc_punctiforme_PCC_73102_uid57767	6689	3015532	NC_010628 NC_010629 NC_010630 NC_010631 NC_010632 NC_010633
Novosphingobium	Novosphingobium_aromaticivorans_DSM_12444_uid57747	3937	1732211	NC_007794 NC_009426 NC_009427
Oceanobacillus	Oceanobacillus_iheyensis_HTE831_uid57867	3500	1338964	NC_004193
Ochrobactrum	Ochrobactrum_anthropi_ATCC_49188_uid58921	4799	2022831	NC_009667 NC_009668 NC_009669 NC_009670 NC_009671 NC_009672
Oenococcus	Oenococcus_oeni_PSU_1_uid59417	1691	647399	NC_008528
Oligotropha	Oligotropha_carboxidovorans_OM5_uid59155	3722	1476613	NC_011386
Onion	Onion_yellows_phytoplasma_OY_M_uid58015	750	280398	NC_005303
Opitutus	Opitutus_terrae_PB90_1_uid58965	4612	2203725	NC_010571
Orientia	Orientia_tsutsugamushi_Ikeda_uid58869	1967	701889	NC_010793
Paenibacillus	Paenibacillus_JDR_2_uid59021	6213	2717112	NC_012914
Parabacteroides	Parabacteroides_distasonis_ATCC_8503_uid58301	3849	1862217	NC_009615
Paracoccus	Paracoccus_denitrificans_PD1222_uid58187	5077	2089148	NC_008686 NC_008687 NC_008688
Parvibaculum	Parvibaculum_lavamentivorans_DS_1_uid58739	3636	1565930	NC_009719
Pasteurella	Pasteurella_multocida_Pm70_uid57627	2012	899392	NC_002663
Pectobacterium	Pectobacterium_carotovorum_PC1_uid59295	4246	1931142	NC_012917
Pediococcus	Pediococcus_pentosaceus_ATCC_25745_uid57981	1755	723551	NC_008525
Pedobacter	Pedobacter_heparinus_DSM_2366_uid59111	4252	2032746	NC_013061
Pelobacter	Pelobacter_propionicus_DSM_2379_uid58255	3804	1634221	NC_008607 NC_008608 NC_008609
Pelodictyon	Pelodictyon_phaeoclathratiforme_BU_1_uid58173	2707	1158981	NC_011060
Pelotomaculum	Pelotomaculum_thermopropionicum_SI_uid58877	2919	1185257	NC_009454
Persephonella	Persephonella_marina_EX_H1_uid58119	2051	834415	NC_012439 NC_012440
Petrotoga	Petrotoga_mobilis_SJ95_uid58747	1898	830268	NC_010003
Phenylobacterium	Phenylobacterium_zucineum_HLK1_uid58959	3854	1691621	NC_011143 NC_011144
Photobacterium	Photobacterium_profundum_SS9_uid62923	5489	2265659	NC_005871 NC_006370 NC_006371
Photorhabdus	Photorhabdus_luminescens_laumondii_TTO1_uid61593	4683	2073781	NC_005126
Picrophilus	Picrophilus_torridus_DSM_9790_uid58041	1537	619774	NC_005877
Polaromonas	Polaromonas_JS666_uid58207	5453	2216839	NC_007948 NC_007949 NC_007950
Polynucleobacter	Polynucleobacter_necessarius_asymbioticus_QLW_P1DMWA_1_uid58611	2077	928959	NC_009379
Porphyromonas	Porphyromonas_gingivalis_ATCC_33277_uid58879	2090	898578	NC_010729
Prochlorococcus	Prochlorococcus_marinus_MIT_9303_uid58305	2997	1088433	NC_008820
Propionibacterium	Propionibacterium_acnes_KPA171202_uid58101	2297	994903	NC_006085
Prosthecochloris	Prosthecochloris_aestuarii_DSM_271_uid58151	2327	1004408	NC_011059 NC_011061
Proteus	Proteus_mirabilis_HI4320_uid61599	3662	1500249	NC_010554 NC_010555
Pseudoalteromonas	Pseudoalteromonas_atlantica_T6c_uid58283	4281	1927822	NC_008228
Pseudomonas	Pseudomonas_fluorescens_SBW25_uid62971	6395	2765204	NC_009444 NC_012660
Psychrobacter	Psychrobacter_cryohalolentis_K5_uid58373	2511	1110869	NC_007968 NC_007969
Psychromonas	Psychromonas_ingrahamii_37_uid58521	3545	1531680	NC_008709
Pyrobaculum	Pyrobaculum_aerophilum_IM2_uid57727	2604	912864	NC_003364
Pyrococcus	Pyrococcus_furiosus_DSM_3638_uid57873	2122	787353	NC_003413
Ralstonia	Ralstonia_eutropha_H16_uid62925	6626	2783866	NC_005241 NC_008313 NC_008314
Renibacterium	Renibacterium_salmoninarum_ATCC_33209_uid58899	3507	1327602	NC_010168
Rhizobium	Rhizobium_leguminosarum_bv__viciae_3841_uid57955	7143	2977413	NC_008378 NC_008379 NC_008380 NC_008381 NC_008382 NC_008383 NC_008384
Rhodobacter	Rhodobacter_sphaeroides_KD131_uid59277	4569	1864156	NC_011958 NC_011960 NC_011962 NC_011963
Rhodococcus	Rhodococcus_jostii_RHA1_uid58325	9145	3739863	NC_008268 NC_008269 NC_008270 NC_008271
Rhodoferax	Rhodoferax_ferrireducens_T118_uid58353	4417	1921242	NC_007901 NC_007908
Rhodopirellula	Rhodopirellula_baltica_SH_1_uid61589	7325	2986970	NC_005027
Rhodopseudomonas	Rhodopseudomonas_palustris_TIE_1_uid58995	5246	2211116	NC_011004
Rhodospirillum	Rhodospirillum_rubrum_ATCC_11170_uid57655	3838	1686104	NC_007641 NC_007643
Rickettsia	Rickettsia_felis_URRWXCal2_uid58331	1512	570217	NC_007109 NC_007110 NC_007111
Robiginitalea	Robiginitalea_biformata_HTCC2501_uid58285	3209	1418088	NC_013222
Roseiflexus	Roseiflexus_RS_1_uid58523	4517	2076299	NC_009523
Roseobacter	Roseobacter_denitrificans_OCh_114_uid58597	4129	1676868	NC_008209 NC_008386 NC_008387 NC_008388 NC_008389
Rubrobacter	Rubrobacter_xylanophilus_DSM_9941_uid58057	3140	1314828	NC_008148
Ruegeria	Ruegeria_pomeroyi_DSS_3_uid57863	4252	1735368	NC_003911 NC_006569
Saccharomonospora	Saccharomonospora_viridis_DSM_43017_uid59055	3828	1682586	NC_013159
Saccharophagus	Saccharophagus_degradans_2_40_uid57921	4007	1823755	NC_007912
Saccharopolyspora	Saccharopolyspora_erythraea_NRRL_2338_uid62947	7197	3112902	NC_009142
Salinibacter	Salinibacter_ruber_DSM_13855_uid58513	2833	1290462	NC_007677 NC_007678
Salinispora	Salinispora_arenicola_CNS_205_uid58659	4917	2123445	NC_009953
Salmonella	Salmonella_enterica_serovar_Paratyphi_B_SPB7_uid59097	5590	2222703	NC_010102
Serratia	Serratia_proteamaculans_568_uid58725	4942	2100926	NC_009829 NC_009832
Shewanella	Shewanella_woodyi_ATCC_51908_uid58721	4880	2183814	NC_010506
Shigella	Shigella_sonnei_Ss046_uid58217	4470	1740374	NC_007384 NC_007385 NC_009345 NC_009346 NC_009347
Sinorhizobium	Sinorhizobium_medicae_WSM419_uid58549	6213	2585451	NC_009620 NC_009621 NC_009622 NC_009636
Slackia	Slackia_heliotrinireducens_DSM_20476_uid59051	2766	1214841	NC_013165
Sodalis	Sodalis_glossinidius__morsitans__uid58553	2516	987640	NC_007712 NC_007713 NC_007714 NC_007715
Sorangium	Sorangium_cellulosum__So_ce_56__uid61629	9380	4674546	NC_010162
Sphingomonas	Sphingomonas_wittichii_RW1_uid58691	5345	2290337	NC_009507 NC_009508 NC_009511
Sphingopyxis	Sphingopyxis_alaskensis_RB2256_uid58351	3195	1335905	NC_008036 NC_008048
Staphylococcus	Staphylococcus_aureus_NCTC_8325_uid57795	2891	1133967	NC_007795
Staphylothermus	Staphylothermus_marinus_F1_uid58719	1573	611541	NC_009033
Stenotrophomonas	Stenotrophomonas_maltophilia_K279a_uid61647	4386	1927949	NC_010943
Streptococcus	Streptococcus_sanguinis_SK36_uid58381	2270	936246	NC_009009
Streptomyces	Streptomyces_coelicolor_A3_2__uid57801	8153	3431849	NC_003888 NC_003903 NC_003904
Sulfolobus	Sulfolobus_solfataricus_P2_uid57721	2978	1119411	NC_002754
Sulfurihydrogenibium	Sulfurihydrogenibium_YO3AOP1_uid58855	1721	712180	NC_010730
Sulfurimonas	Sulfurimonas_denitrificans_DSM_1251_uid58185	2096	900615	NC_007575
Sulfurovum	Sulfurovum_NBC37_1_uid58863	2438	1001143	NC_009663
Symbiobacterium	Symbiobacterium_thermophilum_IAM_14863_uid58165	3337	1389035	NC_006177
Synechococcus	Synechococcus_PCC_7002_uid59137	3187	1320783	NC_010474 NC_010475 NC_010476 NC_010477 NC_010478 NC_010479 NC_010480
Synechocystis	Synechocystis_PCC_6803_uid57659	3575	1471011	NC_000911 NC_005229 NC_005230 NC_005231 NC_005232
Syntrophobacter	Syntrophobacter_fumaroxidans_MPOB_uid58177	4064	1794192	NC_008554
Syntrophomonas	Syntrophomonas_wolfei_Goettingen_uid58179	2504	1114723	NC_008346
Syntrophus	Syntrophus_aciditrophicus_SB_uid58539	3166	1240292	NC_007759
Teredinibacter	Teredinibacter_turnerae_T7901_uid59267	4254	1938849	NC_012997
Thauera	Thauera_MZ1T_uid58987	3978	1717367	NC_011662 NC_011667
Thermoanaerobacter	Thermoanaerobacter_tengcongensis_MB4_uid57813	2588	1055499	NC_003869
Thermobifida	Thermobifida_fusca_YX_uid57703	3087	1281635	NC_007333
Thermococcus	Thermococcus_kodakarensis_KOD1_uid58225	2306	866162	NC_006624
Thermodesulfovibrio	Thermodesulfovibrio_yellowstonii_DSM_11347_uid59257	2033	863510	NC_011296
Thermofilum	Thermofilum_pendens_Hrk_5_uid58563	1878	725647	NC_008696 NC_008698
Thermomicrobium	Thermomicrobium_roseum_DSM_5159_uid59341	2854	1172417	NC_011959 NC_011961
Thermoplasma	Thermoplasma_acidophilum_DSM_1728_uid61573	1484	603307	NC_002578
Thermoproteus	Thermoproteus_neutrophilus_V24Sta_uid58421	1966	736912	NC_010525
Thermosipho	Thermosipho_africanus_TCF52B_uid59095	1954	801922	NC_011653
Thermosynechococcus	Thermosynechococcus_elongatus_BP_1_uid57907	2476	1007912	NC_004113
Thermotoga	Thermotoga_lettingae_TMO_uid58419	2040	873788	NC_009828
Thermus	Thermus_thermophilus_HB27_uid58033	2210	875986	NC_005835 NC_005838
Thioalkalivibrio	Thioalkalivibrio_sulfidophilus_HL_EbGr7_uid59179	3283	1379482	NC_011901
Thiobacillus	Thiobacillus_denitrificans_ATCC_25259_uid58189	2827	1173448	NC_007404
Thiomicrospira	Thiomicrospira_crunogena_XCL_2_uid58183	2196	944107	NC_007520
Tolumonas	Tolumonas_auensis_DSM_9187_uid59395	3130	1343571	NC_012691
Treponema	Treponema_denticola_ATCC_35405_uid57583	2767	1136579	NC_002967
Trichodesmium	Trichodesmium_erythraeum_IMS101_uid57925	4451	1962643	NC_008312
Tropheryma	Tropheryma_whipplei_Twist_uid57705	808	345328	NC_004572
Ureaplasma	Ureaplasma_urealyticum_serovar_10_ATCC_33699_uid59011	646	340181	NC_011374
Variovorax	Variovorax_paradoxus_S110_uid59437	6279	2693477	NC_012791 NC_012792
Verminephrobacter	Verminephrobacter_eiseniae_EF01_2_uid58675	4947	2184183	NC_008771 NC_008786
Vibrio	Vibrio_harveyi_ATCC_BAA_1116_uid58957	6041	2343918	NC_009777 NC_009783 NC_009784
Wigglesworthia	Wigglesworthia_glossinidia_endosymbiont_of_Glossina_brevipalpis_uid57853	617	284080	NC_003425 NC_004344
Wolbachia	Wolbachia_endosymbiont_of_Culex_quinquefasciatus_Pel_uid61645	1275	562517	NC_010981
Wolinella	Wolinella_succinogenes_DSM_1740_uid61591	2043	863386	NC_005090
Xanthobacter	Xanthobacter_autotrophicus_Py2_uid58453	5035	2168910	NC_009717 NC_009720
Xanthomonas	Xanthomonas_campestris_vesicatoria_85_10_uid58321	4726	2129728	NC_007504 NC_007505 NC_007506 NC_007507 NC_007508
Xylella	Xylella_fastidiosa_9a5c_uid57849	2832	1010043	NC_002488 NC_002489 NC_002490
Yersinia	Yersinia_pseudotuberculosis_IP_31758_uid58487	4324	1847145	NC_009704 NC_009705 NC_009708
Zymomonas	Zymomonas_mobilis_ZM4_uid58095	1736	758437	NC_006526
